# Supplementary material
Source: PubMed Central journal article supplement (PMC4136198)
Supplement: IAI.01793-14_zii999090809so1.pdf [file IAI.01793-14_zii999090809so1.pdf]

A

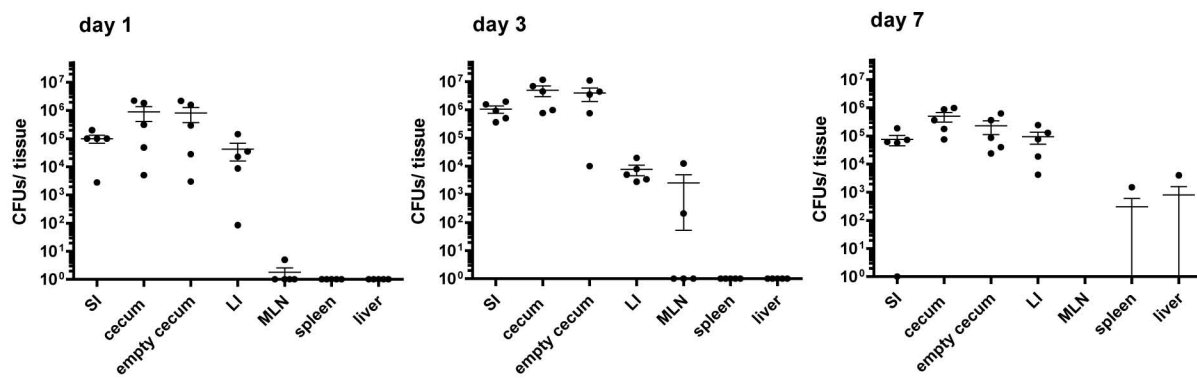

B

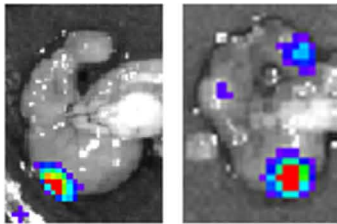

**Supplemental Figure S1.** *Y. pseudotuberculosis* mainly colonizes the cecum during low dose infection. (A) BALB/c mice were orally infected with  $0.64 \times 10^7$  CFUs/mL, and tissues were homogenized, serially diluted, and plated in triplicate on days 1, 3, and 7 p.i. Data are presented as mean and SEM of five organs at each time point. (B) IVIS signal in the cecum from low dose infected, asymptomatic BALB/c mice at days 24 and 34 p.i.

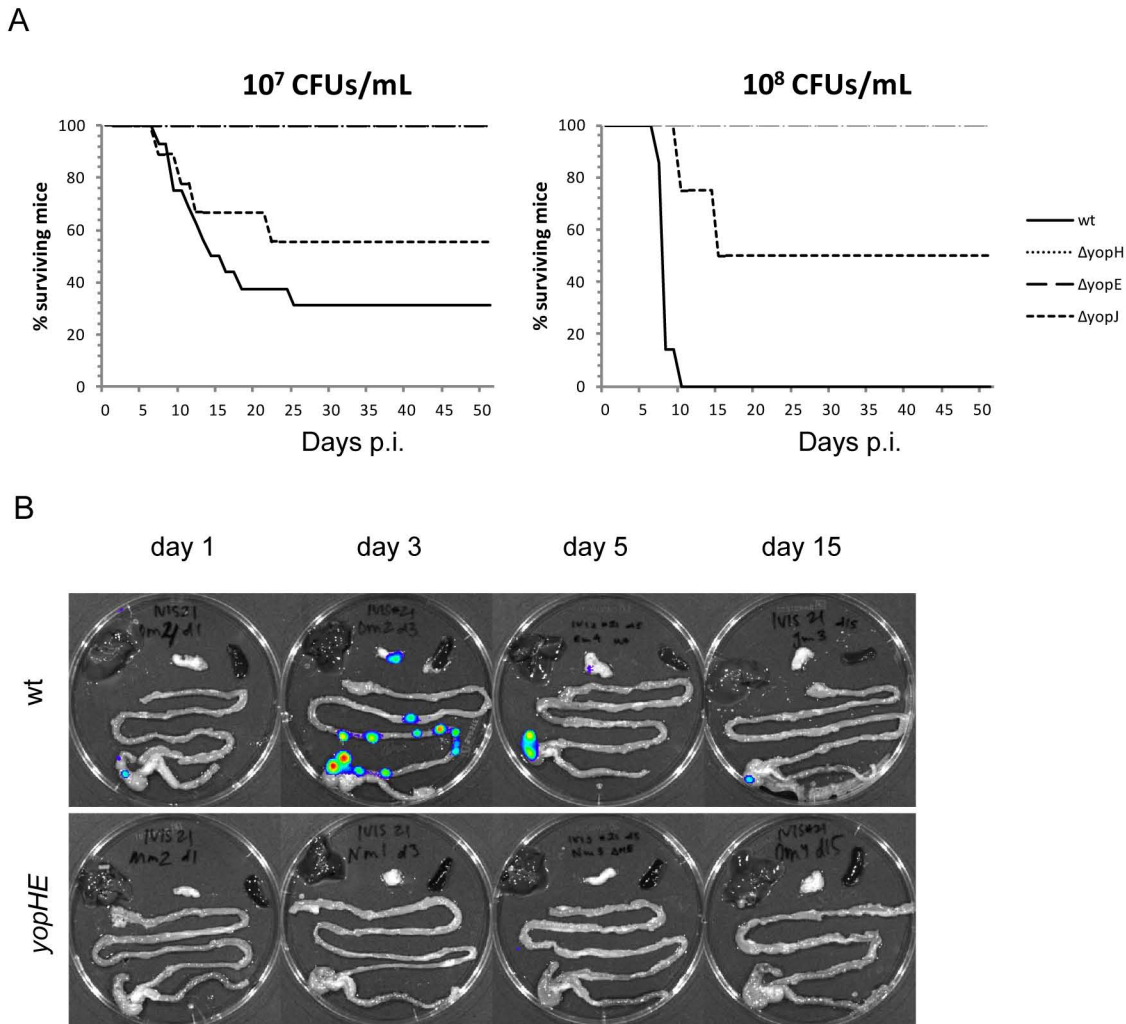

**Supplemental Figure S2.** *Y. pseudotuberculosis* YopH and YopE are important for susceptibility to infection, and for initial colonization in cecum. (A) Susceptibility to infection in BALB/c mice infected with  $1.4 - 1.8 \times 10^7$  or  $1.4 - 2.0 \times 10^8$  CFUs/mL bacteria. (B) Organs dissected from BALB/c mice infected with  $10^7$  CFUs/mL wt or  $10^8$  CFUs/mL yopEH mutant bacteria, and imaged by IVIS to reveal bacterial localization at indicated time points p.i.

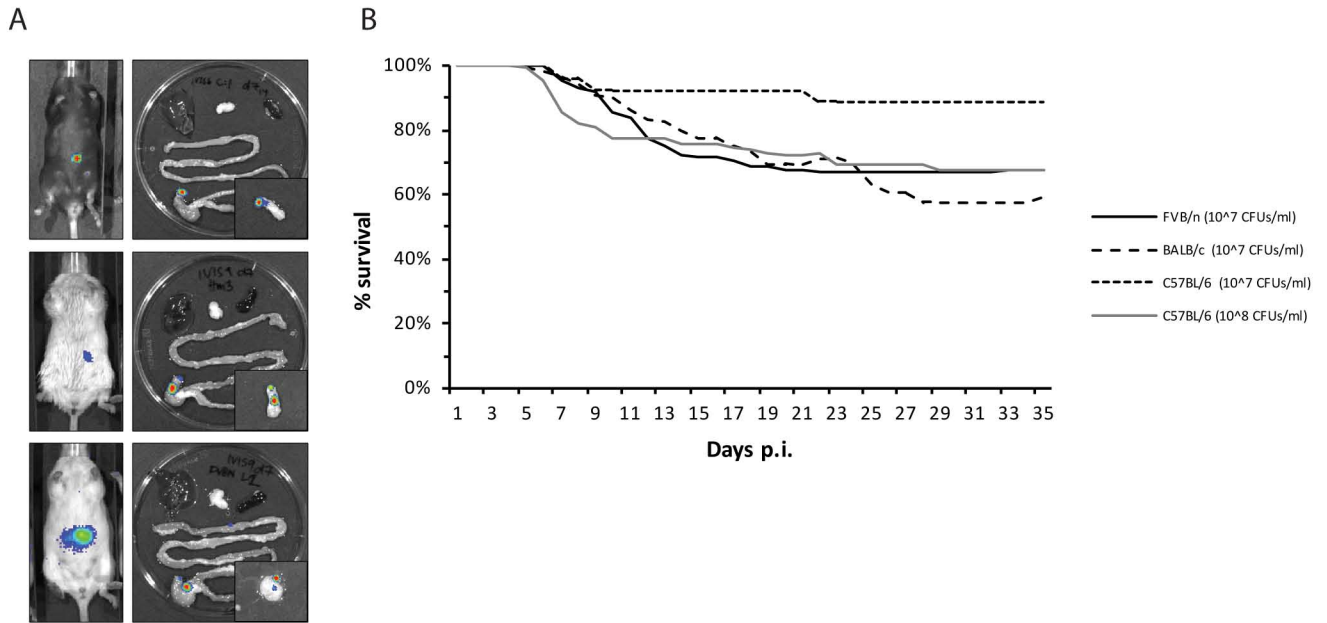

**Supplemental Figure S3.** Susceptibility to *Y. pseudotuberculosis* infection in different mouse strains. (A) Cecal localization of *Y. pseudotuberculosis* on day 7 p.i. in different mouse strains. From top: C57BL/6, BALB/c, and FVB/N. (B) Survival in C57BL/6, BALB/c, and FVB/N after infection with *Y. pseudotuberculosis*.

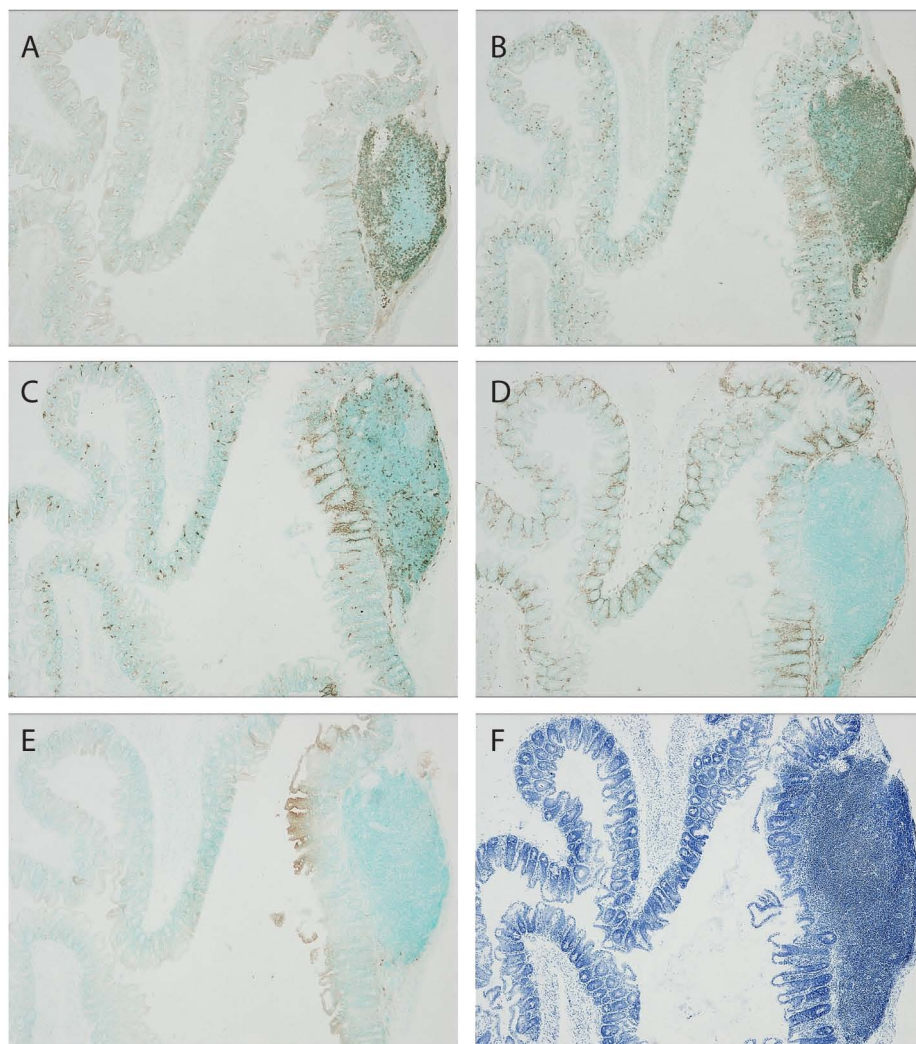

**FIG S4** Immunohistochemical staining of control cecum. Binding of monoclonal antibodies with amplification of signal by streptavidin-biotin and HRP-conjugated anti-biotin: (A) anti-B220 for B cells, (B) anti-CD3 for T cells, (C) anti-CD11c for dendritic cells, (D) anti-F4/80 for macrophages, (E) anti-Ly6G6C for PMNs. Positive cells are brown (DAB) and the background is green (methyl green). (F) Toluidine Blue-stained section. Magnification: 4 $\times$ . Note: the apical staining by anti-Ly6G6C (E) of epithelium covering the follicle is unspecific.

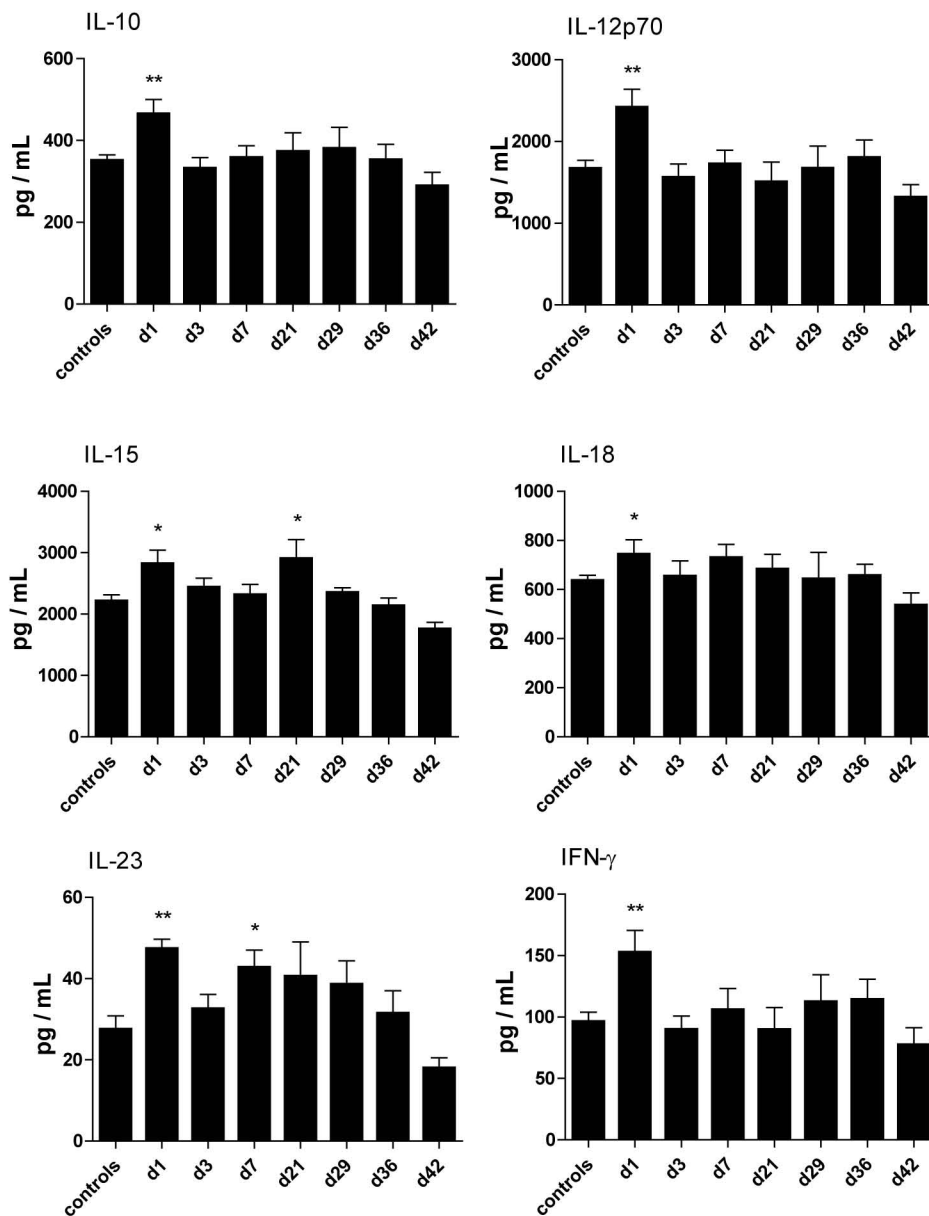

**Supplemental Figure S5.** Unaltered cytokines in serum of mice with persistent infections. Serum from infected FVB/N mice was sampled, and analyzed by multiplex array for IL-10, IL-12p70, IL-15, IL-18, IL-23, and IFN- $\gamma$  at indicated time points p.i. Columns represent mean values, and error bars represent the SEM. Day 1 (n = 5), day 3 (n = 5), day 7 (n = 6), day 21 (n = 8), day 29 (n = 5), day 36 (n = 10 persistent, 9 cleared), day 42 (n = 7 persistent, 5 cleared). Controls (n = 2) were grouped from each time point. Data are presented as mean  $\pm$  SEM. Differences between controls and respective analysis day were analyzed by unpaired t-test with significance set at \*P < 0.05, \*\*P < 0.01 and \*\*\*P < 0.001.

**Supplement Table S1. Bacteria shed in feces**

| <b>Mouse strain</b> | <b>Time point</b> | <b>CFUs/g feces</b> |
|---------------------|-------------------|---------------------|
| <b>BALB/c</b>       | day 30            | $3.1 \times 10^3$   |
|                     |                   | $11 \times 10^3$    |
|                     |                   | $5.5 \times 10^6$   |
|                     | day 32            | $0.45 \times 10^6$  |
|                     |                   | $0.22 \times 10^6$  |
|                     | day 38            | $5.5 \times 10^3$   |
| $6.7 \times 10^3$   |                   |                     |
| <b>FVB/N</b>        | day 36            | $0.11 \times 10^6$  |
|                     |                   | $1.6 \times 10^6$   |
|                     |                   | $4.5 \times 10^6$   |
|                     | day 98            | $0.36 \times 10^6$  |
|                     |                   | $0.55 \times 10^6$  |
|                     | day 115           | $3.6 \times 10^6$   |
| $0.17 \times 10^6$  |                   |                     |

Fecal pellets were collected from IVIS positive mice at indicated time points. They were homogenized, serially diluted, and plated in triplicate.
